# Supplementary material for: Bird population declines and species turnover are changing the acoustic properties of spring soundscapes
Source: PubMed Central journal article supplement (PMC8564540; doi:10.1038/s41467-021-26488-1), 2021-11-02
Supplement: 41467_2021_26488_MOESM1_ESM.pdf [file 41467_2021_26488_MOESM1_ESM.pdf]

- 1 **Bird population declines and species turnover are changing the acoustic properties of**
- 2 **spring soundscapes**

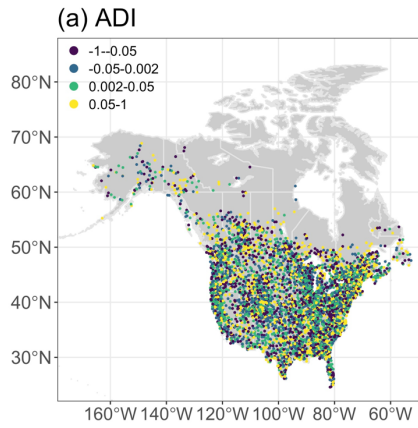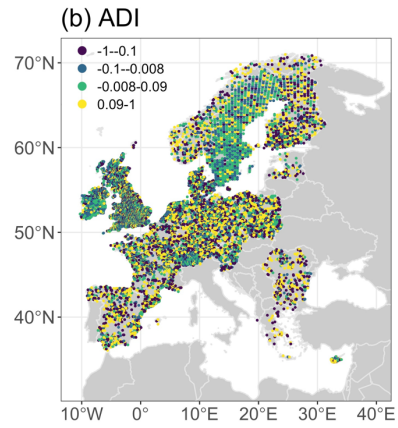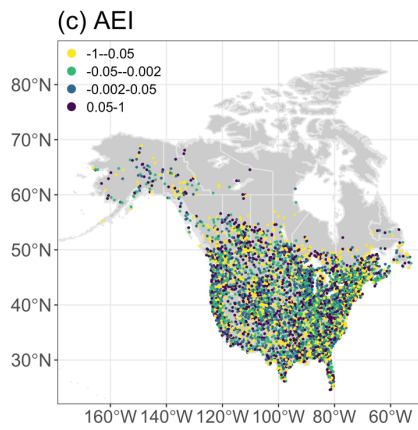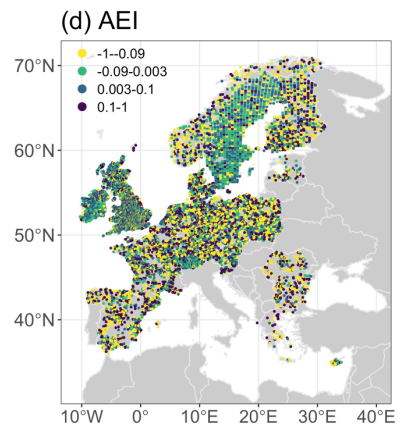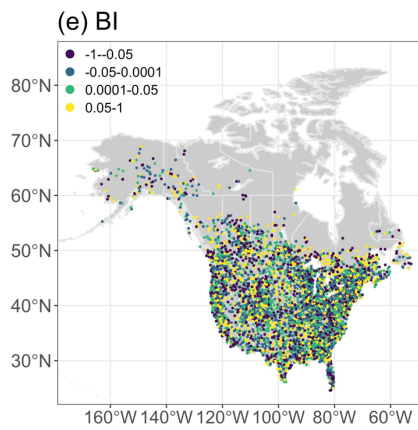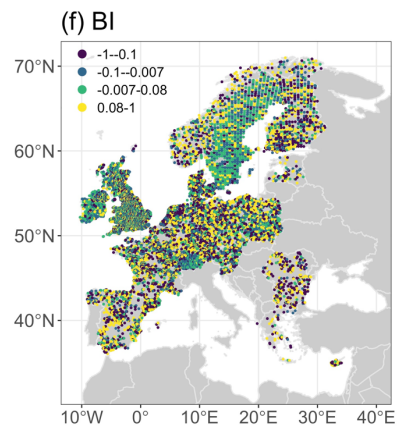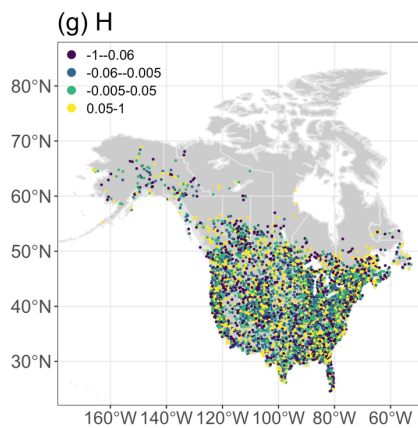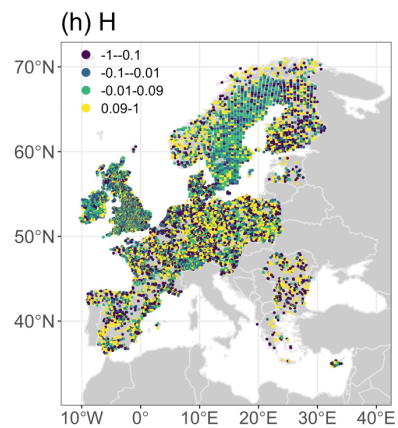

4 **Supplementary Figure 1: Site-level spatial variation in acoustic index trends.** Site-level  
5 trends in Acoustic Diversity Index, ADI (a,b), Acoustic Evenness Index, AEI (c,d), Bioacoustic  
6 Index, BI (e,f) and Acoustic Entropy, H (g,h) at the first site of 4196 NA-BBS routes across  
7 North America between 1996 and 2017 and in 16524 PECBMS sites across Europe surveyed  
8 in at least three years between 1998 and 2018. Colours indicate the size and direction of  
9 trend; note that the colour scheme is reversed for AEI, as positive trends are taken to  
10 represent a reduction in soundscape quality for this metric. Note that site-level trends are  
11 derived from changes in standardised annual values of each acoustic index.

12

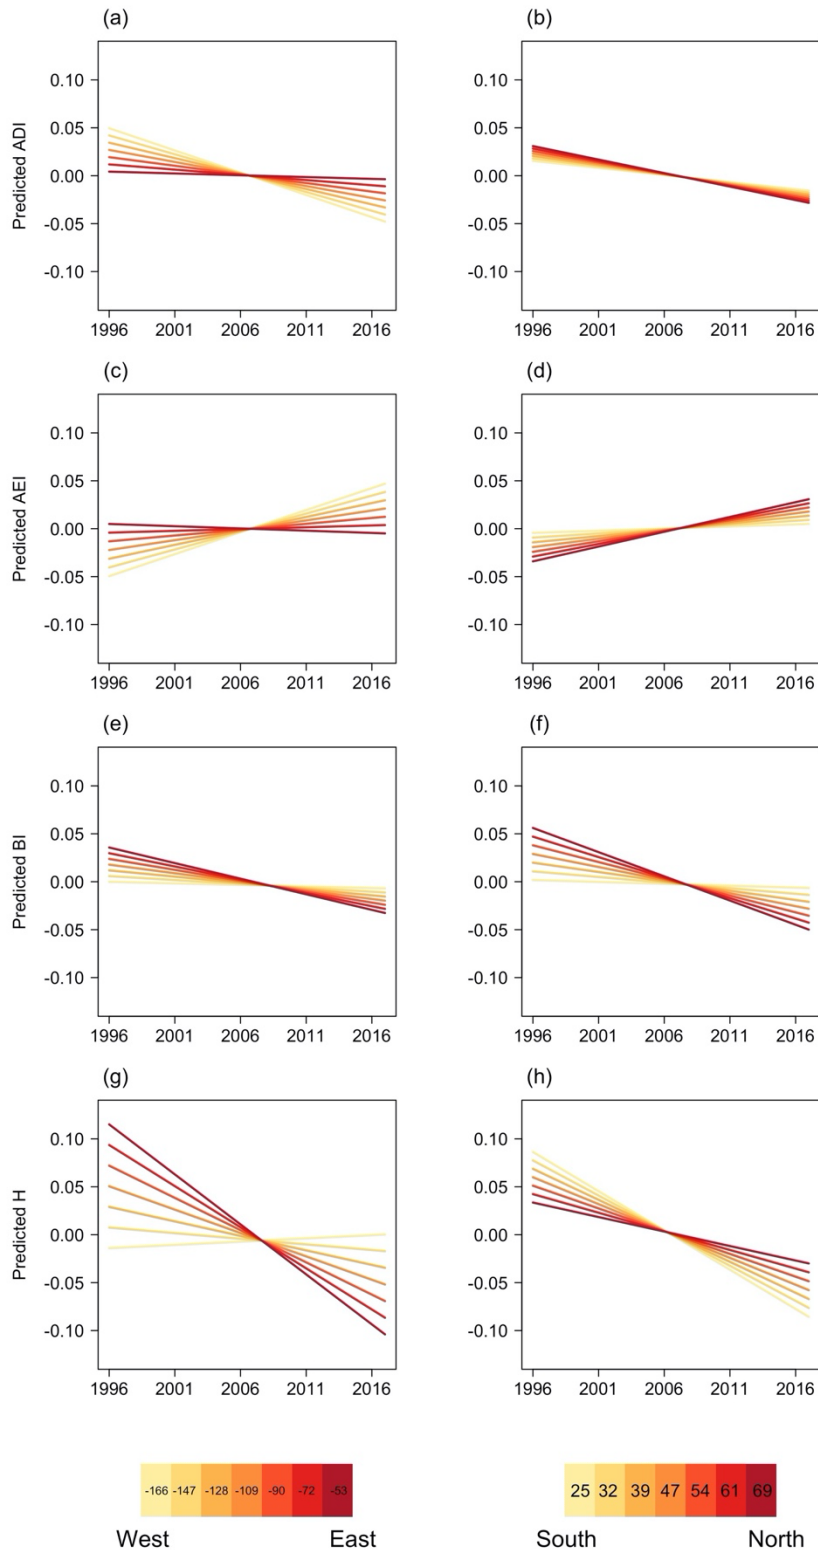

13

14 **Supplementary Figure 2: Predicted trends in acoustic indices across North America.**

15 Predicted temporal trends in Acoustic Diversity Index, ADI (a,b), Acoustic Evenness Index,

16 AEI (c,d), Bioacoustic Index, BI (e,f) and Acoustic Entropy, H (g,h) in North America between

17 1996 and 2017. Coloured lines indicate predicted trends (Supplementary Table 1) at varying  
18 longitudes (left column) and latitudes (right column) at equal intervals across the range of  
19 the dataset from west and south (yellow) to east and north (red). Note that predicted  
20 trends reflect temporal changes in standardised acoustic indices.

21

22

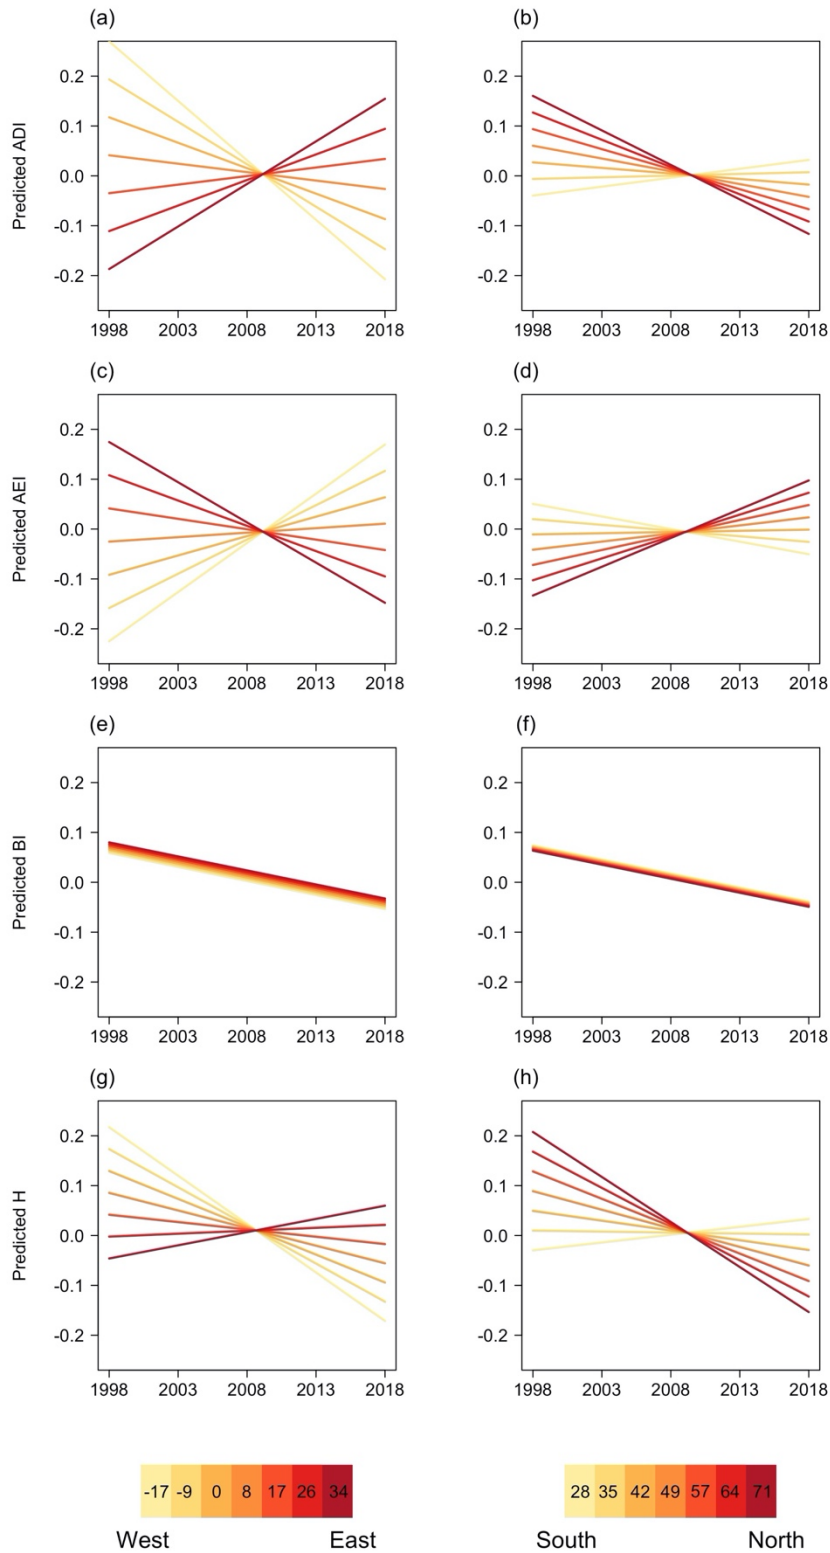

23

24 **Supplementary Figure 3: Predicted trends in acoustic indices across Europe.** Predicted

25 temporal trends in Acoustic Diversity Index, ADI (a,b), Acoustic Evenness Index, AEI (c,d),

26 Bioacoustic Index, BI (e,f) and Acoustic Entropy, H (g,h) in Europe between 1998 and 2018.

27 Coloured lines indicate predicted trends (Supplementary Table 2) at varying longitudes (left  
28 column) and latitudes (right column) at equal intervals across the range of the dataset from  
29 west and south (yellow) to east and north (red). Note that predicted trends reflect temporal  
30 changes in standardised acoustic indices.

31

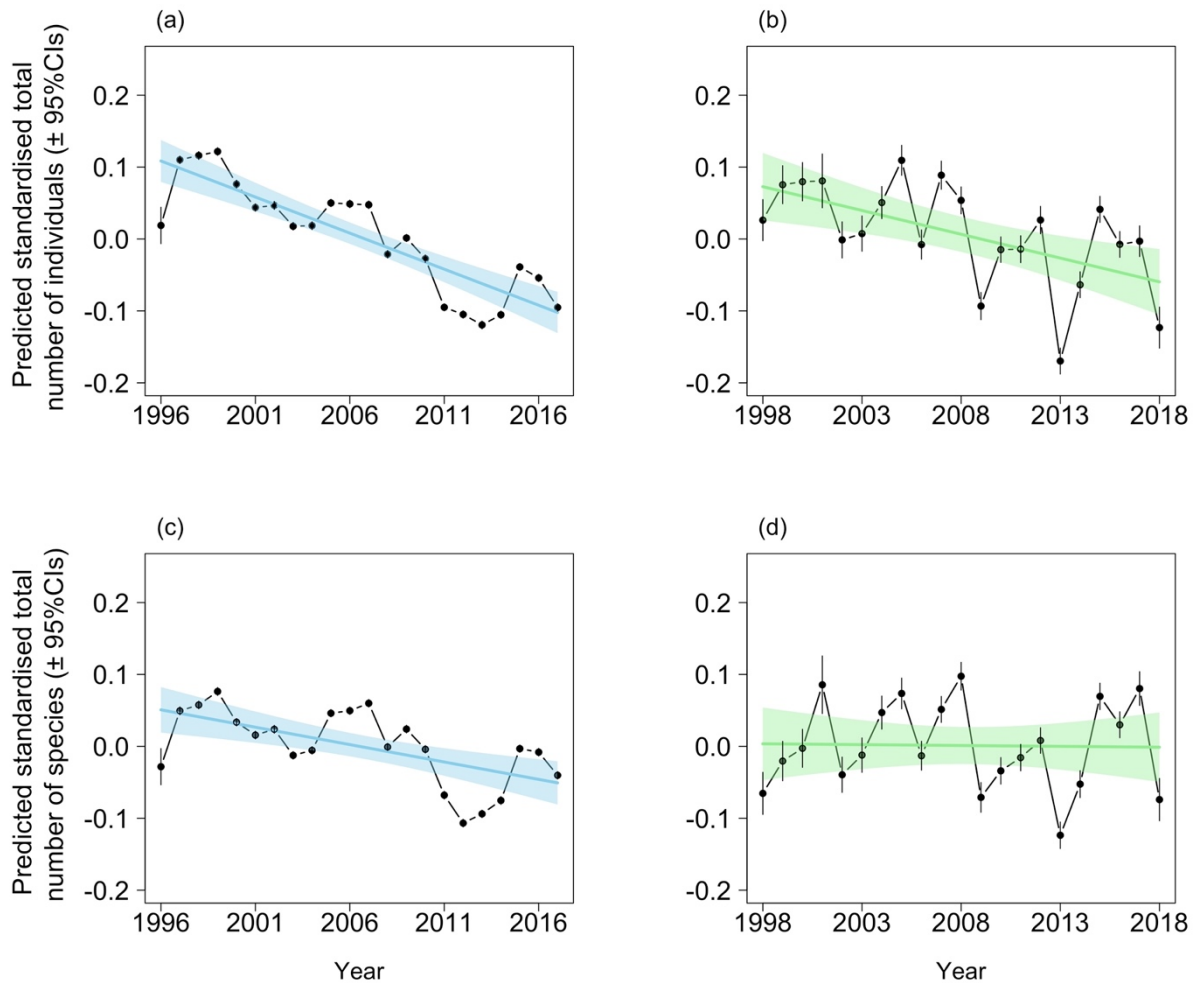

32

33 **Supplementary Figure 4: Temporal trends in abundance and species richness.** Predicted

34 annual variation in the total number of individuals (a,c) and total number of species (b,d) in

35 North America (left column) between 1996 and 2017 and in Europe (right column) between

36 1998 and 2018. Blue (North America) and green (Europe) lines show the predicted trends

37 from GLMMs (Supplementary Table 4); shaded areas indicate 95% confidence intervals.

38 Points show predicted annual values from GLMMs with the identical structure as those in

39 Supplementary Table 4 but with year fitted as a categorical rather than a continuous

40 variable, vertical lines indicate the 95% confidence intervals. Note that the total number of

41 individuals and species recorded each year at each site were standardised prior to analyses.



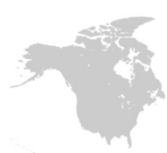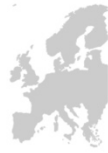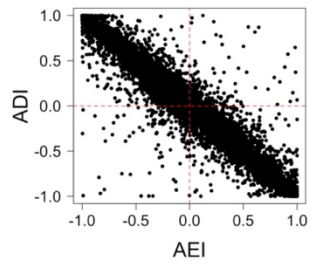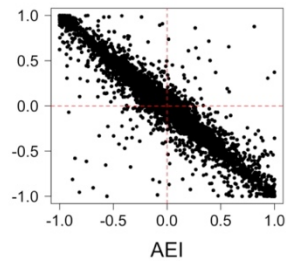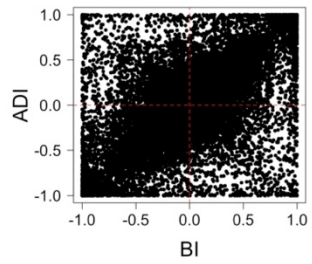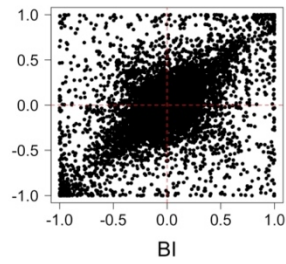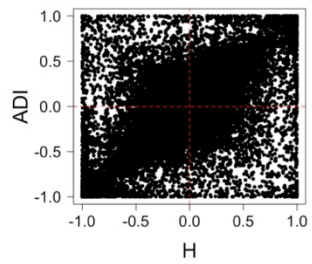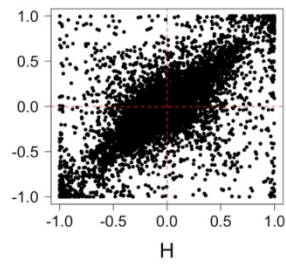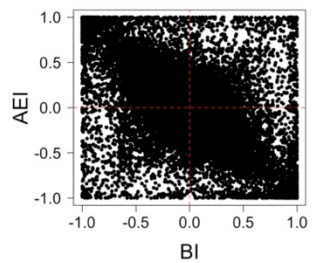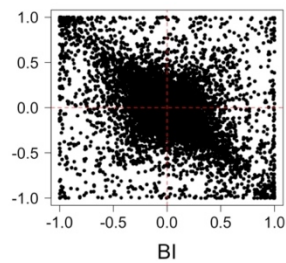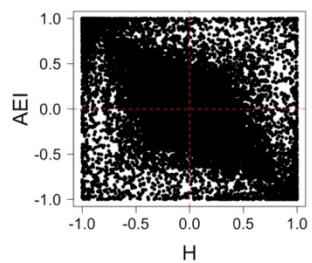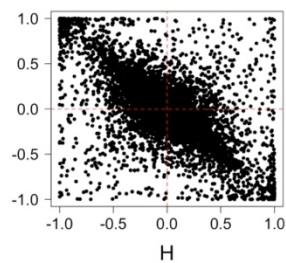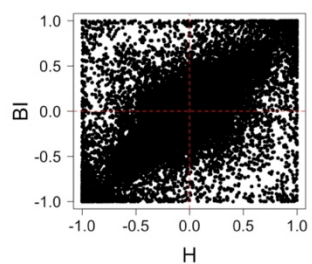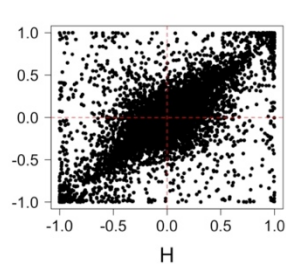

43 **Supplementary Figure 5: Correlations in acoustic indices.** Pairwise associations between site-  
44 level trends in acoustic indices (Acoustic Diversity Index (ADI), Acoustic Evenness Index (AEI),  
45 Bioacoustic Index (BI), Acoustic Entropy (H)) in 202737 NA-BBS sites across North America  
46 (left column) and in 16524 PECBMS sites across Europe (right column). Note that site-level  
47 trends are derived from changes in standardised annual values of each acoustic index.

48

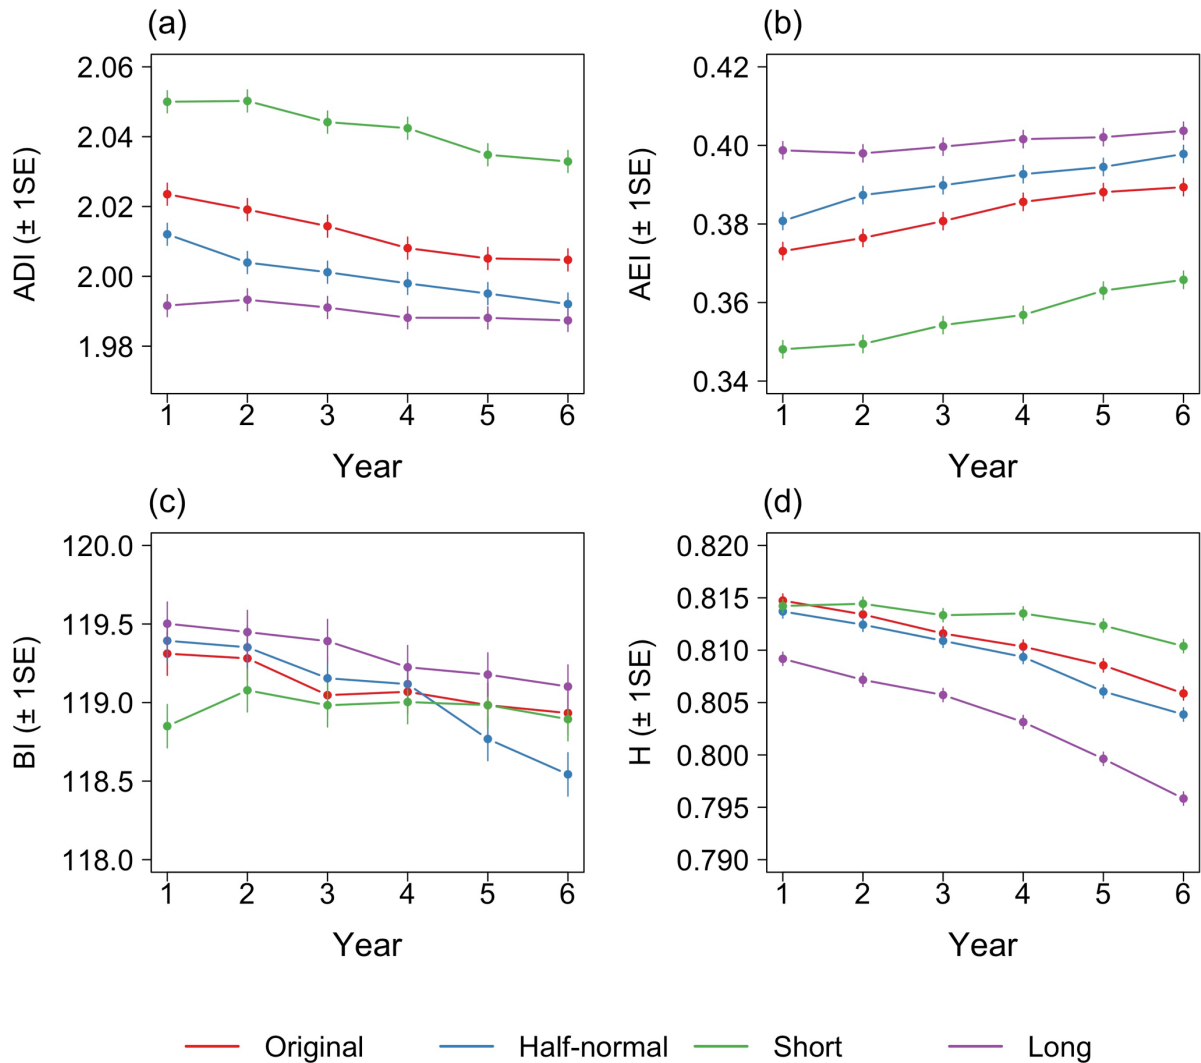

49

50 **Supplementary Figure 6: Sensitivity of acoustic metrics to soundscape construction**

51 **methods.** Mean ( $\pm 1$  standard error) Acoustic Diversity Index, ADI (a), Acoustic Evenness

52 Index, AEI (b), Bioacoustic Index, BI (c) and Acoustic Entropy, H (d) of constructed

53 soundscapes over a 6-year period for 1000 communities containing 10 randomly sampled

54 European species. The abundance of each species in Year 1 was set to 10 individuals and

55 declined linearly to five individuals by Year 6. Each line represents acoustic index values for

56 soundscapes constructed using different methods: Original – default setting of 5-minute

57 soundscape and playback volume sampled from a uniform distribution; Half-normal: 5-

58 minute soundscape with playback volume sampled from a half-normal distribution; Short: 3-

59 minute soundscape with playback volume sampled from a uniform distribution; Long: 10-

60 minute soundscape with playback volume sampled from a uniform distribution.

61

62 **Supplementary Table 1.** Results of GLMMs of the variation in a) Acoustic Diversity Index  
63 (ADI), (b) Acoustic Evenness Index (AEI), (c) Bioacoustic Index (BI) and (d) Acoustic Entropy  
64 (H) in 202737 NA-BBS sites across North America surveyed in at least three years between  
65 1996 and 2017. Note that annual values for each acoustic index were standardised at the  
66 site-level prior to analyses.

|         | <b>Fixed effects</b> | <b>Estimate (SE)</b> | <b><math>\chi^2</math></b> | <b>DF</b> | <b>p</b> |
|---------|----------------------|----------------------|----------------------------|-----------|----------|
| (a) ADI | Latitude             | 0.00038 (0.00020)    | 0.01                       | 1         | 0.951    |
|         | Longitude            | -0.00044 (0.00008)   | 0.32                       | 1         | 0.569    |
|         | Year                 | 0.00285 (0.00095)    | 8.46                       | 1         | 0.004    |
|         | Latitude*year        | -0.00003 (0.00001)   | 4.21                       | 1         | 0.004    |
|         | Longitude*year       | 0.00003 (0.00001)    | 43.11                      | 1         | <0.001   |
| (b) AEI | Latitude             | -0.00073 (0.00020)   | 0.01                       | 1         | 0.930    |
|         | Longitude            | 0.00052 (0.00007)    | 0.23                       | 1         | 0.634    |
|         | Year                 | -0.00528 (0.00087)   | 6.47                       | 1         | 0.011    |
|         | Latitude*year        | 0.00006 (0.00001)    | 16.45                      | 1         | <0.001   |
|         | Longitude*year       | -0.00004 (0.00001)   | 60.80                      | 1         | <0.001   |
| (c) BI  | Latitude             | 0.00134 (0.00020)    | 0.18                       | 1         | 0.667    |
|         | Longitude            | 0.00034 (0.00008)    | 0.68                       | 1         | 0.409    |
|         | Year                 | -0.00027 (0.00110)   | 6.08                       | 1         | 0.014    |
|         | Latitude*year        | -0.00011 (0.00001)   | 51.10                      | 1         | <0.001   |
|         | Longitude*year       | -0.00003 (0.00001)   | 20.36                      | 1         | <0.001   |
| (d) H   | Latitude             | -0.00131 (0.00020)   | 2.26                       | 1         | 0.132    |

|                |                    |        |   |        |
|----------------|--------------------|--------|---|--------|
| Longitude      | 0.00124 (0.00007)  | 1.89   | 1 | 0.169  |
| Year           | -0.02041 (0.00186) | 12.79  | 1 | <0.001 |
| Latitude*year  | 0.00012 (0.00001)  | 63.03  | 1 | <0.001 |
| Longitude*year | -0.00010 (0.00001) | 293.03 | 1 | <0.001 |

---

68 **Supplementary Table 2.** Results of GLMMs of the variation in a) Acoustic Diversity Index  
69 (ADI), (b) Acoustic Evenness Index (AEI), (c) Bioacoustic Index (BI) and (d) Acoustic Entropy  
70 (H) in 16524 PECBMS sites across Europe surveyed in at least three years between 1998  
71 and 2018. Only significant interaction effects are retained. Note that annual values for each  
72 acoustic index were standardised at the site-level prior to analyses.

|         | <b>Fixed effects</b> | <b>Estimate (SE)</b> | <b><math>\chi^2</math></b> | <b>DF</b> | <b>p</b> |
|---------|----------------------|----------------------|----------------------------|-----------|----------|
| (a) ADI | Latitude             | 0.0054 (0.0013)      | 0.05                       | 1         | 0.816    |
|         | Longitude            | -0.0093 (0.0008)     | 3.48                       | 1         | 0.062    |
|         | Year                 | 0.0109 (0.0058)      | 5.99                       | 1         | 0.014    |
|         | Latitude*year        | -0.0004 (0.0001)     | 17.64                      | 1         | <0.001   |
|         | Longitude*year       | 0.0008 (0.0001)      | 206.13                     | 1         | <0.001   |
| (b) AEI | Latitude             | -0.0046 (0.0013)     | 0.30                       | 1         | 0.582    |
|         | Longitude            | 0.0085 (0.0008)      | 2.72                       | 1         | 0.099    |
|         | Year                 | -0.0123 (0.0058)     | 3.09                       | 1         | 0.079    |
|         | Latitude*year        | 0.0004 (0.0001)      | 16.00                      | 1         | <0.001   |
|         | Longitude*year       | -0.0007 (0.0001)     | 158.13                     | 1         | <0.001   |
| (c) BI  | Latitude             | -0.0002 (0.0005)     | 0.24                       | 1         | 0.621    |
|         | Longitude            | 0.0004 (0.0003)      | 2.26                       | 1         | 0.132    |
|         | Year                 | -0.0056 (0.0021)     | 6.91                       | 1         | 0.009    |
| (d) H   | Latitude             | 0.0060 (0.0013)      | 0.32                       | 1         | 0.571    |
|         | Longitude            | -0.0056 (0.0008)     | 4.07                       | 1         | 0.044    |
|         | Year                 | 0.0146 (0.0059)      | 10.02                      | 1         | 0.001    |

|                |                  |       |   |        |
|----------------|------------------|-------|---|--------|
| Latitude*year  | -0.0005 (0.0001) | 26.14 | 1 | <0.001 |
| Longitude*year | 0.0005 (0.0001)  | 75.14 | 1 | <0.001 |

---

73

74



75 **Supplementary Table 3:** Results of GLMMs of the variation in community structure: (a) the  
76 total number of individuals and (b) the total number of species in 202737 NA-BBS sites  
77 across North America between 1996 and 2017 and in 16524 PECBMS sites across Europe  
78 between 1998 and 2018. Note that the total number of individuals and species recorded  
79 each year at each site were standardised prior to analyses.

|                                 | Fixed effects | North America    |          |    |        | Europe           |          |    |       |
|---------------------------------|---------------|------------------|----------|----|--------|------------------|----------|----|-------|
|                                 |               | Estimate (SE)    | $\chi^2$ | DF | p      | Estimate (SE)    | $\chi^2$ | DF | p     |
| (a) Total number of individuals | Latitude      | 0.0001 (0.0001)  | 2.80     | 1  | 0.094  | 0.0009 (0.0005)  | 0.03     | 1  | 0.848 |
|                                 | Longitude     | 0.0001 (0.0001)  | 7.21     | 1  | 0.007  | -0.0002 (0.0003) | 0.33     | 1  | 0.564 |
|                                 | Year          | -0.0100 (0.0012) | 66.2     | 1  | <0.001 | -0.0003 (0.0022) | 0.02     | 1  | 0.887 |
| (b) Total number of species     | Latitude      | 0.0001 (0.0001)  | 0.587    | 1  | 0.044  | 0.0001 (0.0005)  | 0.03     | 1  | 0.863 |
|                                 | Longitude     | 0.0001 (0.0001)  | 2.030    | 1  | 0.154  | 0.0001 (0.0003)  | 0.38     | 1  | 0.537 |
|                                 | Year          | -0.0048 (0.0013) | 13.12    | 1  | <0.001 | -0.0066 (0.0021) | 9.96     | 1  | 0.002 |

80

81

82 **Supplementary Table 4:** Results of Pearson correlations of pairwise associations between  
 83 site-level trends in acoustic indices, Acoustic Diversity Index (ADI), Acoustic Evenness Index  
 84 (AEI), Bioacoustic Index (BI) and Acoustic Entropy (H), in 202737 NA-BBS sites across North  
 85 America and in 16524 PECBMS sites across Europe. Note that site-level trends are derived  
 86 from changes in standardised annual values of each acoustic index.

| Pairwise comparison | North America |         |        | Europe |         |        |
|---------------------|---------------|---------|--------|--------|---------|--------|
|                     | r             | t       | p      | r      | t       | p      |
| ADI-AEI             | -0.97         | -1921   | <0.001 | -0.95  | -385.07 | <0.001 |
| ADI-BI              | 0.59          | 329.53  | <0.001 | 0.47   | 67.82   | <0.001 |
| ADI-H               | 0.54          | 288.38  | <0.001 | 0.62   | 102.00  | <0.001 |
| AEI-BI              | -0.56         | -307.65 | <0.001 | -0.40  | -54.98  | <0.001 |
| AEI-H               | -0.51         | -271.81 | <0.001 | -0.61  | -100.14 | <0.001 |
| BI-H                | 0.67          | 404.23  | <0.001 | 0.62   | 101.47  | <0.001 |

87

88 **Supplementary Table 5:** The survey method, number of sites included in our analyses and  
 89 period covered by each of the PECBMS schemes.

| <b>Country</b> | <b>Survey method</b>            | <b>Number of sites</b> | <b>Range of time series</b> |
|----------------|---------------------------------|------------------------|-----------------------------|
| Austria        | Point counts                    | 348                    | 1998 – 2017                 |
| Belgium        | Point counts                    | 252                    | 1998 – 2017                 |
| Bulgaria       | Line transects                  | 176                    | 2005 – 2016                 |
| Catalonia      | Line transects                  | 327                    | 2002 – 2016                 |
| Cyprus         | Line transects                  | 136                    | 2006 - 2017                 |
| Czech Republic | Point counts                    | 197                    | 1998 - 2018                 |
| Denmark        | Point counts                    | 708                    | 1998 - 2016                 |
| Estonia        | Point counts                    | 15                     | 1998 - 2016                 |
| Finland        | Line transects and point counts | 706                    | 1998 - 2016                 |
| France         | Point counts                    | 1484                   | 2001 - 2017                 |
| Germany        | Line transects                  | 1324                   | 2005 - 2016                 |
| Greece         | Point counts                    | 44                     | 2007 - 2016                 |
| Netherlands    | Territory mapping               | 1510                   | 1998 - 2016                 |
| Ireland        | Line transects                  | 399                    | 1998 - 2016                 |
| Latvia         | Line transects                  | 45                     | 2005 - 2016                 |
| Norway         | Point counts                    | 411                    | 2006 - 2018                 |
| Poland         | Line transects                  | 975                    | 2000 - 2017                 |
| Romania        | Point counts                    | 200                    | 2007 - 2017                 |
| Slovenia       | Line transects                  | 104                    | 2007 - 2017                 |

|                |                                 |      |             |
|----------------|---------------------------------|------|-------------|
| Spain          | Point counts                    | 721  | 1998 - 2016 |
| Sweden         | Line transects and point counts | 716  | 1998 - 2017 |
| Switzerland    | Territory mapping               | 259  | 1999 - 2016 |
| United Kingdom | Line transects                  | 5467 | 1998 – 2018 |

---

**Supplementary Table 6:** Results of Moran's I test for spatial autocorrelation in the modelled residuals of the GLMMs for North America (Supplementary Table 1) and Europe (Supplementary Table 2): a) Acoustic Diversity Index (ADI), (b) Acoustic Evenness Index (AEI), (c) Bioacoustic Index (BI) and (d) Acoustic Entropy (H). Years were tested separately.

| North America |      |          |          |                    |        | Europe |          |          |                    |        |
|---------------|------|----------|----------|--------------------|--------|--------|----------|----------|--------------------|--------|
|               | Year | Observed | Expected | Standard deviation | p      | Year   | Observed | Expected | Standard deviation | p      |
| (a) ADI       | 1996 | -0.0492  | -0.0085  | 0.0278             | 0.1428 | 1998   | 0.0038   | -0.0002  | 0.0012             | 0.0010 |
|               | 1997 | 0.0006   | -0.0004  | 0.0011             | 0.3691 | 1999   | 0.0075   | -0.0002  | 0.0011             | <0.001 |
|               | 1998 | 0.0026   | -0.0004  | 0.0012             | 0.0116 | 2000   | 0.0072   | -0.0002  | 0.0011             | <0.001 |
|               | 1999 | 0.0017   | -0.0004  | 0.0013             | 0.1105 | 2001   | 0.0109   | -0.0004  | 0.0028             | <0.001 |
|               | 2000 | 0.0007   | -0.0004  | 0.0013             | 0.4134 | 2002   | 0.0054   | -0.0002  | 0.0010             | <0.001 |
|               | 2001 | 0.0000   | -0.0004  | 0.0013             | 0.7600 | 2003   | 0.0082   | -0.0002  | 0.0009             | <0.001 |
|               | 2002 | -0.0016  | -0.0004  | 0.0014             | 0.3895 | 2004   | 0.0053   | -0.0002  | 0.0008             | <0.001 |
|               | 2003 | 0.0007   | -0.0004  | 0.0014             | 0.4301 | 2005   | 0.0022   | -0.0001  | 0.0007             | <0.001 |
|               | 2004 | 0.0020   | -0.0004  | 0.0011             | 0.0234 | 2006   | 0.0025   | -0.0001  | 0.0006             | <0.001 |
|               | 2005 | 0.0006   | -0.0004  | 0.0011             | 0.4020 | 2007   | 0.0049   | -0.0001  | 0.0006             | <0.001 |
|               | 2006 | 0.0022   | -0.0004  | 0.0013             | 0.0468 | 2008   | 0.0026   | -0.0001  | 0.0006             | <0.001 |
|               | 2007 | 0.0024   | -0.0004  | 0.0011             | 0.0098 | 2009   | 0.0031   | -0.0001  | 0.0006             | <0.001 |
|               | 2008 | 0.0010   | -0.0004  | 0.0014             | 0.3321 | 2010   | 0.0019   | -0.0001  | 0.0005             | <0.001 |
|               | 2009 | 0.0004   | -0.0004  | 0.0012             | 0.5331 | 2011   | 0.0064   | -0.0001  | 0.0005             | <0.001 |
|               | 2010 | -0.0013  | -0.0004  | 0.0014             | 0.5020 | 2012   | 0.0035   | -0.0001  | 0.0004             | <0.001 |
|               | 2011 | 0.0032   | -0.0004  | 0.0010             | <0.001 | 2013   | 0.0031   | -0.0001  | 0.0004             | <0.001 |

|      |         |         |        |        |      |        |         |        |        |
|------|---------|---------|--------|--------|------|--------|---------|--------|--------|
| 2012 | 0.0006  | -0.0004 | 0.0014 | 0.4532 | 2014 | 0.0022 | -0.0001 | 0.0005 | <0.001 |
| 2013 | -0.0005 | -0.0004 | 0.0012 | 0.9273 | 2015 | 0.0026 | -0.0001 | 0.0004 | <0.001 |
| 2014 | -0.0001 | -0.0004 | 0.0015 | 0.8354 | 2016 | 0.0045 | -0.0001 | 0.0005 | <0.001 |
| 2015 | 0.0025  | -0.0004 | 0.0014 | 0.0355 | 2017 | 0.0039 | -0.0002 | 0.0006 | <0.001 |
| 2016 | 0.0011  | -0.0004 | 0.0012 | 0.2266 | 2018 | 0.0023 | -0.0003 | 0.0007 | <0.001 |
| 2017 | 0.0008  | -0.0004 | 0.0013 | 0.3554 |      |        |         |        |        |

|                |      |         |         |        |        |      |        |         |        |        |
|----------------|------|---------|---------|--------|--------|------|--------|---------|--------|--------|
| <b>(b) AEI</b> | 1996 | -0.0424 | -0.0085 | 0.0278 | 0.2220 | 1998 | 0.0043 | -0.0002 | 0.0012 | <0.001 |
|                | 1997 | 0.0006  | -0.0004 | 0.0011 | 0.3949 | 1999 | 0.0060 | -0.0002 | 0.0011 | <0.001 |
|                | 1998 | 0.0025  | -0.0004 | 0.0012 | 0.0134 | 2000 | 0.0059 | -0.0002 | 0.0011 | <0.001 |
|                | 1999 | 0.0015  | -0.0004 | 0.0013 | 0.1406 | 2001 | 0.0122 | -0.0004 | 0.0028 | <0.001 |
|                | 2000 | 0.0006  | -0.0004 | 0.0013 | 0.4438 | 2002 | 0.0058 | -0.0002 | 0.0010 | <0.001 |
|                | 2001 | 0.0002  | -0.0004 | 0.0013 | 0.6642 | 2003 | 0.0080 | -0.0002 | 0.0009 | <0.001 |
|                | 2002 | -0.0019 | -0.0004 | 0.0014 | 0.2764 | 2004 | 0.0058 | -0.0002 | 0.0008 | <0.001 |
|                | 2003 | 0.0021  | -0.0004 | 0.0014 | 0.0747 | 2005 | 0.0019 | -0.0001 | 0.0007 | <0.001 |
|                | 2004 | 0.0020  | -0.0004 | 0.0011 | 0.0235 | 2006 | 0.0024 | -0.0001 | 0.0006 | <0.001 |
|                | 2005 | -0.0001 | -0.0004 | 0.0011 | 0.7860 | 2007 | 0.0048 | -0.0001 | 0.0006 | <0.001 |
|                | 2006 | 0.0020  | -0.0004 | 0.0013 | 0.0659 | 2008 | 0.0028 | -0.0001 | 0.0006 | <0.001 |
|                | 2007 | 0.0023  | -0.0004 | 0.0011 | 0.0121 | 2009 | 0.0036 | -0.0001 | 0.0006 | <0.001 |
|                | 2008 | 0.0020  | -0.0004 | 0.0014 | 0.0900 | 2010 | 0.0022 | -0.0001 | 0.0005 | <0.001 |
|                | 2009 | 0.0000  | -0.0004 | 0.0012 | 0.7650 | 2011 | 0.0079 | -0.0001 | 0.0005 | <0.001 |
|                | 2010 | -0.0018 | -0.0004 | 0.0014 | 0.3101 | 2012 | 0.0034 | -0.0001 | 0.0004 | <0.001 |
|                | 2011 | 0.0028  | -0.0004 | 0.0010 | 0.0016 | 2013 | 0.0036 | -0.0001 | 0.0004 | <0.001 |
|                | 2012 | 0.0004  | -0.0004 | 0.0014 | 0.5842 | 2014 | 0.0016 | -0.0001 | 0.0005 | <0.001 |

|      |         |         |        |        |      |        |         |        |        |
|------|---------|---------|--------|--------|------|--------|---------|--------|--------|
| 2013 | -0.0001 | -0.0004 | 0.0012 | 0.7947 | 2015 | 0.0024 | -0.0001 | 0.0004 | <0.001 |
| 2014 | 0.0002  | -0.0004 | 0.0015 | 0.6865 | 2016 | 0.0056 | -0.0001 | 0.0005 | <0.001 |
| 2015 | 0.0020  | -0.0004 | 0.0014 | 0.0799 | 2017 | 0.0032 | -0.0002 | 0.0006 | <0.001 |
| 2016 | 0.0016  | -0.0004 | 0.0012 | 0.1135 | 2018 | 0.0026 | -0.0003 | 0.0007 | <0.001 |
| 2017 | 0.0014  | -0.0004 | 0.0013 | 0.1684 |      |        |         |        |        |

|               |      |         |         |        |        |      |        |         |        |        |
|---------------|------|---------|---------|--------|--------|------|--------|---------|--------|--------|
| <b>(c) BI</b> | 1996 | -0.0017 | -0.0085 | 0.0278 | 0.8068 | 1998 | 0.0078 | -0.0002 | 0.0012 | <0.001 |
|               | 1997 | 0.0019  | -0.0004 | 0.0011 | 0.0465 | 1999 | 0.0078 | -0.0002 | 0.0011 | <0.001 |
|               | 1998 | 0.0033  | -0.0004 | 0.0012 | 0.0017 | 2000 | 0.0047 | -0.0002 | 0.0011 | <0.001 |
|               | 1999 | 0.0006  | -0.0004 | 0.0013 | 0.4415 | 2001 | 0.0145 | -0.0004 | 0.0028 | <0.001 |
|               | 2000 | -0.0003 | -0.0004 | 0.0013 | 0.9230 | 2002 | 0.0013 | -0.0002 | 0.0010 | 0.1405 |
|               | 2001 | 0.0015  | -0.0004 | 0.0013 | 0.1552 | 2003 | 0.0056 | -0.0002 | 0.0009 | <0.001 |
|               | 2002 | -0.0002 | -0.0004 | 0.0014 | 0.8886 | 2004 | 0.0031 | -0.0002 | 0.0008 | <0.001 |
|               | 2003 | 0.0000  | -0.0004 | 0.0014 | 0.7950 | 2005 | 0.0024 | -0.0001 | 0.0007 | <0.001 |
|               | 2004 | 0.0009  | -0.0004 | 0.0011 | 0.2110 | 2006 | 0.0012 | -0.0001 | 0.0006 | 0.0371 |
|               | 2005 | 0.0006  | -0.0004 | 0.0011 | 0.3857 | 2007 | 0.0023 | -0.0001 | 0.0006 | <0.001 |
|               | 2006 | 0.0009  | -0.0004 | 0.0013 | 0.3178 | 2008 | 0.0024 | -0.0001 | 0.0006 | <0.001 |
|               | 2007 | 0.0027  | -0.0004 | 0.0011 | 0.0043 | 2009 | 0.0020 | -0.0001 | 0.0006 | <0.001 |
|               | 2008 | 0.0020  | -0.0004 | 0.0014 | 0.0951 | 2010 | 0.0025 | -0.0001 | 0.0005 | <0.001 |
|               | 2009 | -0.0015 | -0.0004 | 0.0012 | 0.3652 | 2011 | 0.0008 | -0.0001 | 0.0005 | 0.0716 |
|               | 2010 | -0.0018 | -0.0004 | 0.0014 | 0.3241 | 2012 | 0.0023 | -0.0001 | 0.0004 | <0.001 |
|               | 2011 | 0.0012  | -0.0004 | 0.0010 | 0.1123 | 2013 | 0.0021 | -0.0001 | 0.0004 | <0.001 |
|               | 2012 | 0.0015  | -0.0004 | 0.0014 | 0.1568 | 2014 | 0.0016 | -0.0001 | 0.0005 | <0.001 |
|               | 2013 | -0.0004 | -0.0004 | 0.0012 | 0.9789 | 2015 | 0.0033 | -0.0001 | 0.0004 | <0.001 |

|      |         |         |        |        |      |        |         |        |        |
|------|---------|---------|--------|--------|------|--------|---------|--------|--------|
| 2014 | -0.0020 | -0.0004 | 0.0015 | 0.2761 | 2016 | 0.0072 | -0.0001 | 0.0005 | <0.001 |
| 2015 | 0.0020  | -0.0004 | 0.0014 | 0.0814 | 2017 | 0.0043 | -0.0002 | 0.0006 | <0.001 |
| 2016 | 0.0018  | -0.0004 | 0.0012 | 0.0748 | 2018 | 0.0014 | -0.0003 | 0.0007 | 0.0255 |
| 2017 | 0.0000  | -0.0004 | 0.0013 | 0.7756 |      |        |         |        |        |

|              |      |         |         |        |        |      |        |         |        |        |
|--------------|------|---------|---------|--------|--------|------|--------|---------|--------|--------|
| <b>(d) H</b> | 1996 | 0.0197  | -0.0085 | 0.0279 | 0.3119 | 1998 | 0.0133 | -0.0002 | 0.0012 | <0.001 |
|              | 1997 | 0.0025  | -0.0004 | 0.0011 | 0.0093 | 1999 | 0.0131 | -0.0002 | 0.0011 | <0.001 |
|              | 1998 | 0.0028  | -0.0004 | 0.0012 | 0.0072 | 2000 | 0.0111 | -0.0002 | 0.0011 | <0.001 |
|              | 1999 | 0.0018  | -0.0004 | 0.0013 | 0.0884 | 2001 | 0.0193 | -0.0004 | 0.0028 | <0.001 |
|              | 2000 | 0.0005  | -0.0004 | 0.0013 | 0.5046 | 2002 | 0.0074 | -0.0002 | 0.0010 | <0.001 |
|              | 2001 | 0.0021  | -0.0004 | 0.0013 | 0.0599 | 2003 | 0.0092 | -0.0002 | 0.0009 | <0.001 |
|              | 2002 | 0.0023  | -0.0004 | 0.0014 | 0.0544 | 2004 | 0.0067 | -0.0002 | 0.0008 | <0.001 |
|              | 2003 | 0.0003  | -0.0004 | 0.0014 | 0.6037 | 2005 | 0.0034 | -0.0001 | 0.0007 | <0.001 |
|              | 2004 | 0.0023  | -0.0004 | 0.0011 | 0.0112 | 2006 | 0.0037 | -0.0001 | 0.0006 | <0.001 |
|              | 2005 | 0.0000  | -0.0004 | 0.0011 | 0.7559 | 2007 | 0.0042 | -0.0001 | 0.0006 | <0.001 |
|              | 2006 | 0.0004  | -0.0004 | 0.0013 | 0.5399 | 2008 | 0.0026 | -0.0001 | 0.0006 | <0.001 |
|              | 2007 | 0.0044  | -0.0004 | 0.0011 | <0.001 | 2009 | 0.0061 | -0.0001 | 0.0006 | <0.001 |
|              | 2008 | 0.0035  | -0.0004 | 0.0014 | 0.0058 | 2010 | 0.0039 | -0.0001 | 0.0005 | <0.001 |
|              | 2009 | 0.0015  | -0.0004 | 0.0012 | 0.1263 | 2011 | 0.0028 | -0.0001 | 0.0005 | <0.001 |
|              | 2010 | 0.0005  | -0.0004 | 0.0014 | 0.5455 | 2012 | 0.0017 | -0.0001 | 0.0004 | <0.001 |
|              | 2011 | 0.0039  | -0.0004 | 0.0010 | <0.001 | 2013 | 0.0048 | -0.0001 | 0.0004 | <0.001 |
|              | 2012 | 0.0026  | -0.0004 | 0.0014 | 0.0286 | 2014 | 0.0051 | -0.0001 | 0.0005 | <0.001 |
|              | 2013 | 0.0018  | -0.0004 | 0.0012 | 0.0719 | 2015 | 0.0070 | -0.0001 | 0.0004 | <0.001 |
|              | 2014 | -0.0011 | -0.0004 | 0.0015 | 0.6392 | 2016 | 0.0145 | -0.0001 | 0.0005 | <0.001 |



|      |         |         |        |        |      |        |         |        |        |
|------|---------|---------|--------|--------|------|--------|---------|--------|--------|
| 2015 | 0.0042  | -0.0004 | 0.0014 | <0.001 | 2017 | 0.0071 | -0.0002 | 0.0006 | <0.001 |
| 2016 | 0.0007  | -0.0004 | 0.0012 | 0.3899 | 2018 | 0.0021 | -0.0003 | 0.0007 | 0.0017 |
| 2017 | -0.0015 | -0.0004 | 0.0013 | 0.3591 |      |        |         |        |        |

---
